# Supplementary material for: Co9S8nanoparticle-decorated carbon nanofibers as high-performance supercapacitor electrodes
Source: Royal Society of Chemistry journal article supplement (doi:10.1039/c8ra04296a), 2018-01-01
Supplement: c8ra04296a1.pdf [file c8ra04296a1.pdf]

## **Co<sub>9</sub>S<sub>8</sub> Nanoparticles Incorporated Carbon Nanofibers as High-Performance Supercapacitor Electrodes**

Ning Zhang <sup>a</sup>, Wencong Wang <sup>a</sup>, Changqing Teng <sup>a</sup>, Zongxiao Wu <sup>a</sup>, Ziran Ye <sup>b</sup>, Mingjia Zhi <sup>a\*</sup>, and Zhanglian Hong <sup>a</sup>

<sup>a</sup> State Key Laboratory of Silicon Material, School of Materials Science and Engineering, Zhejiang University, 38 Zheda Road, Hangzhou, 310027, China

<sup>b</sup> Department of Applied Physics, Zhejiang University of Technology, Zhaohui Campus, Hangzhou, 310014, China

\* Corresponding Author: [Mingjia\\_Zhi@zju.edu.cn](mailto:Mingjia_Zhi@zju.edu.cn)

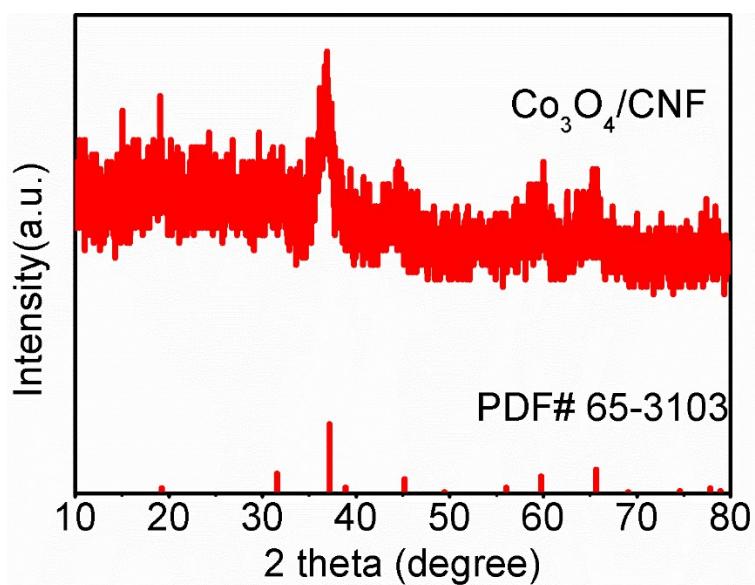

**Figure S1:** XRD pattern of the  $\text{Co}_3\text{O}_4/\text{CNF}$ , the sample was prepared without microwave-assisted sulfurization

**Table S1:** Elements content of the  $\text{Co}_9\text{S}_8/\text{CNF}$  samples tested by XPS

|                                      | Co atomic% | S atomic% | C atomic% |
|--------------------------------------|------------|-----------|-----------|
| $\text{Co}_9\text{S}_8/\text{CNF-1}$ | 5.5        | 3.9       | 90.6      |
| $\text{Co}_9\text{S}_8/\text{CNF-2}$ | 12.5       | 10.0      | 77.4      |
| $\text{Co}_9\text{S}_8/\text{CNF-3}$ | 20.5       | 15.8      | 63.7      |

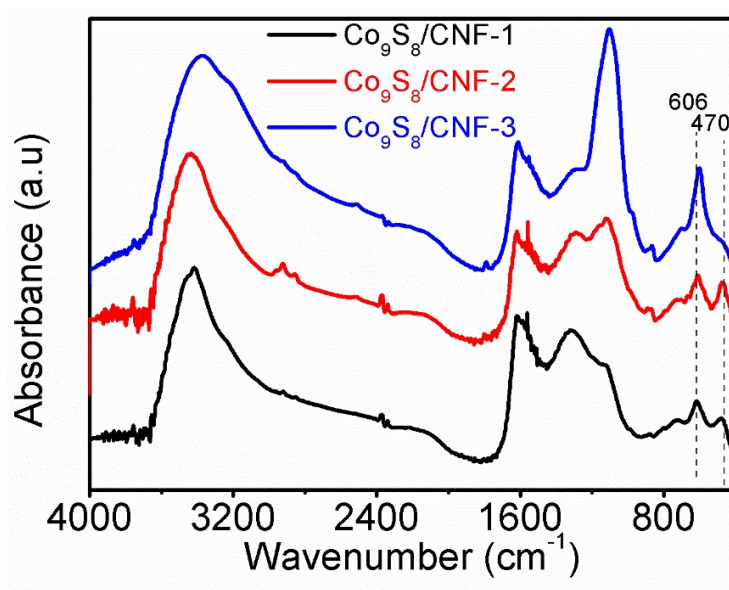

**Figure S2:** FTIR spectra of the  $\text{Co}_9\text{S}_8/\text{CNF}$  samples

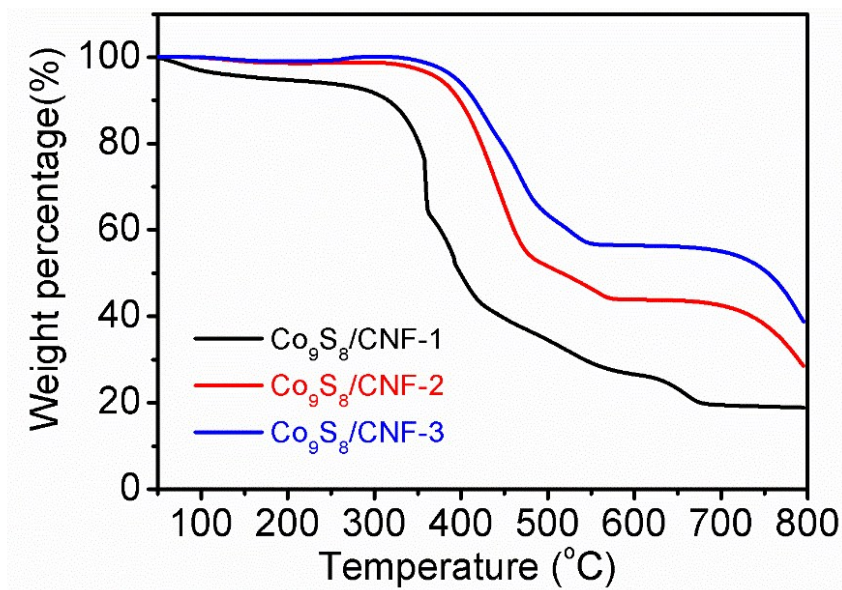

**Figure S3:** TGA curves of the  $\text{Co}_9\text{S}_8/\text{CNF}$  samples

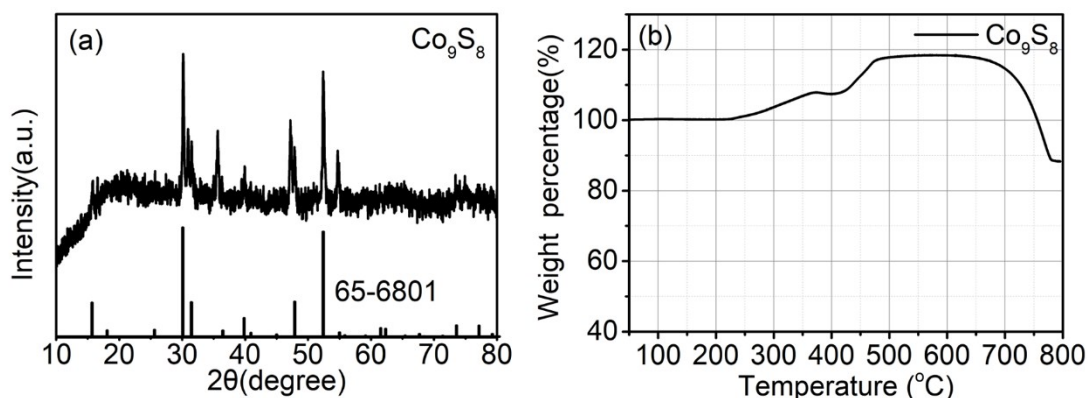

**Figure S4:** (a) XRD pattern of the  $\text{Co}_9\text{S}_8$  sample, and (b) TGA curve of the  $\text{Co}_9\text{S}_8$  sample

The pristine  $\text{Co}_9\text{S}_8$  was synthesized via a simple one-step microwave hydrothermal process similar to the synthesis of  $\text{Co}_9\text{S}_8/\text{CNF}$  series samples. Briefly, cobalt acetates and thioacetamide were dissolved in 10 mL deionized water and the concentration was 0.1M. The mixture was then stirred at room temperature until a pink solution was obtained. After that the mixture was loaded in to the microwave hydrothermal apparatus and heated at high temperature. The temperature and the durations were 120 °C and 1 h. After reaction, the black precipitate was collected, washed with DI water and dried at 60 °C for 6h.

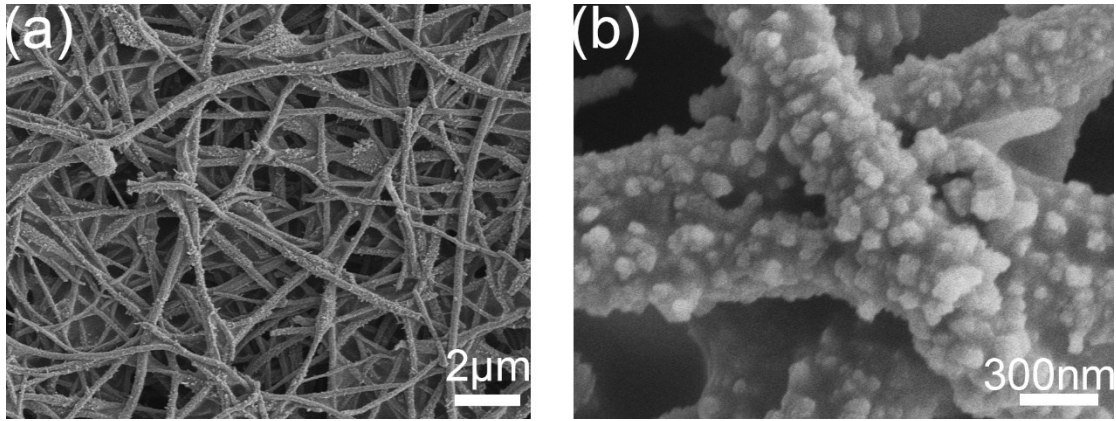

**Figure S5:** SEM images of the  $\text{Co}_3\text{O}_4/\text{CNF-3}$ , (a) low magnification and (b) high magnification

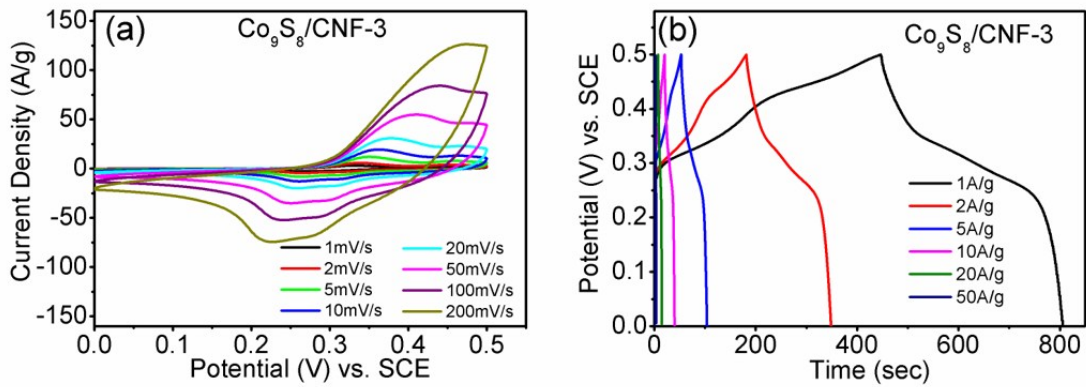

**Figure S6:** (a) CV curves of  $\text{Co}_9\text{S}_8/\text{CNF-3}$  electrode at different scan rates (1 mV/s to 200 mV/s), and (b) GCD curves of  $\text{Co}_9\text{S}_8/\text{CNF-3}$  electrode at different current densities (1 A/g to 50 A/g)
